# Supplementary material for: Teamarbeit und Stress bei Routineeingriffen: eine Beobachtungsstudie multiprofessioneller OP-Teams
Source: Springer Nature journal article supplement (doi:10.1007/s00113-021-00977-w), 2021-03-05
Supplement: MOESM1 [file 18934518]

## Electronic Supplementary Material

Tabelle E 1: Liste und Kurzbeschreibung beobachteter Eingriffe

| Beob.-Nr. | Schnitt-Zeit | Verschluss-Zeit | Beschreibung Eingriff                                                     | ASA-Score | Beobachter      | Anwesende (intra-op)                                                                                                                           | Besonderheiten / Anmerkungen                                                                                                                                                                           |
|-----------|--------------|-----------------|---------------------------------------------------------------------------|-----------|-----------------|------------------------------------------------------------------------------------------------------------------------------------------------|--------------------------------------------------------------------------------------------------------------------------------------------------------------------------------------------------------|
| 1         | 11:45        | 12:40           | VAC-Wechsel mit Materialentfernung                                        | 2         | BEOB1;<br>BEOB3 | 3 Chirurgen;<br>Anästhesistin;<br>instrumentierende Pflegekraft, Springer                                                                      | HIV-Patient (geringe Viruslast);<br>instrumentierende Pflegekraft muss bei Röntgen für ein paar Minuten den Saal verlassen da sie keine Schürze trägt;<br>Wechsel des Anästhesisten (Pausenvertretung) |
| 2         | 13:50        | 14:15           | Rekonstruktion des Ellenbogens                                            | 2         | BEOB1;<br>BEOB3 | 3 Chirurgen; Anästhesist, instrumentierende Pflege, meist 2 Springer; Zuschauer (Famulantin)                                                   | Gastarzt spricht nur englisch                                                                                                                                                                          |
| 3         | 11:35        | 14:55           | tief-anteriore Rektumresektion mit koloanaler Anastomose (laparoskopisch) | 2         | BEOB1;<br>BEOB3 | 3 Chirurgen und 1 PJ'ler am Tisch; Anästhesist; instrumentierende Pflege, Springer                                                             | ca. 12:20 Wechsel Anästhesist (Pausenvertretung)                                                                                                                                                       |
| 4         | 9:07         | 10:05           | Osteosyntheseverfahren durch Schraube (Diagnose: Fraktur des Femurs)      | 2         | BEOB1;<br>BEOB3 | Chirurgie: Hauptoperateur, Assistent, PJ'ler am Tisch; Anästhesist; instrumentierende Pflege, (teilweise 2 ) Springer; Gastarzt als Beobachter | dem Beobachter wird einiges erklärt, hierzu muss sich Hauptoperateur umdrehen; zudem Englisch sprechen                                                                                                 |

|   |       |       |                                                                          |   |                 |                                                                                                                                                                                                                               |                                                                                                                |
|---|-------|-------|--------------------------------------------------------------------------|---|-----------------|-------------------------------------------------------------------------------------------------------------------------------------------------------------------------------------------------------------------------------|----------------------------------------------------------------------------------------------------------------|
| 5 | 11:20 | 12:30 | Osteosyntheseverfahren durch Schraube (Diagnose: Fraktur des Femurs)     | 1 | BEOB1;<br>BEOB3 | 3 Chirurgen;<br>Anästhesist;<br>instrumentierende Pflege,<br>Springer;<br>Gastarzt als Beobachter                                                                                                                             | Gastarzt als Beobachter im Saal; Hauptoperateur geht um 12:15; Anästhesist wechselt (während Zunähen um 12:25) |
| 6 | 13:25 | 15:45 | Osteosyntheseverfahren durch Platte (Humerusfraktur)                     | 2 | BEOB1;<br>BEOB3 | 2 Chirurgen (zweiter kommt erst kurz nach Schnitt) + PJ'ler am Tisch;<br>Anästhesist;<br>instrumentierende Pflege,<br>Springer                                                                                                | Wechsel des Anästhesisten um 13:45 (gute Übergabe), kommt wieder um 14:25; Springer wechselt 3 mal             |
| 7 | 8:50  | 9:20  | Rektum Stimulation bei analer Inkontinenz                                | 2 | BEOB2;<br>BEOB3 | 2 Chirurgen (+ Vertreter von Ausrüstungsfirma, instruiert Chirurgie);<br>Anästhesist<br>instrumentierende Pflege,<br>Springer (+ 2 beobachtende Schüler)                                                                      | Vertreter Instrumentenfirma (Ausrüstung Schrittmacher) anwesend und spricht mit / instruiert Chirurgen         |
| 8 | 11:15 | 12:10 | Rekonstruktion Abfluss der Lebervene; Z.n. Leberoperation (Revisions-OP) | 3 | BEOB2;<br>BEOB3 | 2 Chirurgen<br>zu Beginn 1 Anästhesie-Assistenzarzt + 2 Anästhesie-Pfleger (bis 20 Minuten nach OP-Beginn), zeitweilig 1 Anästhesie-OA, zeitweilig 1 Anästhesie-Pflege + 1 PJ'lerin;<br>instrumentierende Pflege,<br>Springer | während OP teilweise Chefarzt anwesend                                                                         |
| 9 | 13:25 | 15:21 | CrDSS over Venen Stripping                                               | 3 | BEOB2;<br>BEOB3 | 2 Chirurgen;<br>Anästhesist;<br>Springer,<br>instrumentierende Pflege<br>+ 1 Schüler                                                                                                                                          | Wechsel Anästhesist unter OP; sehr ruhige OP (wenig Unterbrechungen)                                           |

|    |       |       |                                                                             |   |                 |                                                                                                                                                      |                                                                                                                                                                                           |
|----|-------|-------|-----------------------------------------------------------------------------|---|-----------------|------------------------------------------------------------------------------------------------------------------------------------------------------|-------------------------------------------------------------------------------------------------------------------------------------------------------------------------------------------|
| 10 | 10:40 | 12:17 | Diagnostische Arthroskopie des Handgelenks                                  | 2 | BEOB1;<br>BEOB3 | Chirurg + 1 PJ'ler am Tisch, später 2 Chirurgen; Anästhesistin; instrumentierende Pflege, Springer                                                   | zweiter Chirurg kommt im 11:50 hinzu; Wechsel Anästhesie 11:55                                                                                                                            |
| 11 | 13:30 | 15:05 | Arthroskopie der Schulter (laparoskopisch)                                  | 2 | BEOB1;<br>BEOB3 | 2 Chirurgen; Anästhesist; instrumentierende Pflege, Springer; Zuschauer: Gastarzt (englischsprachig); 2 PJ'ler;                                      | Erläuterungen an zusehenden Gastarzt auf Englisch; nicht komplett angeleitete OP: schwierigeren Teil übernimmt OA; instrumentierende Pflegekraft geht kurz vor Ende der Operation (14:55) |
| 12 | 8:45  | 11:00 | Hiatushernie-Fundoplikation (laparoskopisch mit neuer Roboterunterstützung) | 2 | BEOB2;<br>BEOB3 | 2 Chirurgen, 2 Vertreter der Roboterfirma<br>Anästhesistin<br>3 chirurg. Pflege: instr. Pflege + Springer + Helferin (+ teilweise Stützpunktleitung) | neues Equipment (Einsatz eines OP-Roboters mit Kameraarm; Vertreter anwesend)                                                                                                             |
| 13 | 12:08 | 14:28 | Splenektomie (offen)                                                        | 4 | BEOB2;<br>BEOB3 | 2 Chirurgen + 1 PJ'ler nach 30 min;<br>Anästhesie: Oberarzt, Assistenzarzt<br>Instrumentierende Pflege, Springer, Azubi                              | OP-Instrumente anfänglich nicht da; Patient insgesamt kritischer Zustand                                                                                                                  |
| 14 | 9:10  | 9:45  | Ileostomaanlage bei Rektumkarzinom (laparoskopisch)                         | 3 | BEOB1;<br>BEOB3 | 2 Chirurgen;<br>Anästhesist + PJ'lerin;<br>instrumentierende Pflege, Springer                                                                        | Wechsel Anästhesie                                                                                                                                                                        |
| 15 | 9:03  | 9:36  | Sinus pilonidalis Exzision nach Karydakis                                   | 2 | BEOB1;<br>BEOB3 | 1 Chirurg;<br>Anästhesistin, teilweise A-Pflege + A-Pflege-Schülerin<br>instrumentierende Pflege, Springer,                                          |                                                                                                                                                                                           |

|    |       |       |                                                                                       |   |                 |                                                                                                                                                                                           |                                                                                                                                                              |
|----|-------|-------|---------------------------------------------------------------------------------------|---|-----------------|-------------------------------------------------------------------------------------------------------------------------------------------------------------------------------------------|--------------------------------------------------------------------------------------------------------------------------------------------------------------|
| 16 | 13:04 | 15:10 | Zugurtungsosteosynthese an Patella (Patellafraktur)                                   | 2 | BEOB1;<br>BEOB3 | 3 Chirurgen + 1 PJter am Tisch;<br>Anästhesistin<br>instrumentierende Pflege,<br>Springer;                                                                                                | 14:58 Wechsel<br>instrumentierende Schwester;<br>15:07 Springer wechselt                                                                                     |
| 17 | 8:35  | 9:07  | Parathyreoidektomie                                                                   | 3 | BEOB1;<br>BEOB3 | 2 Chirurgen (zweiter<br>Chirurg erst ab 08:40);<br>Anästhesistin, teilweise A-<br>Pflege;<br>instrumentierende Pflege,<br>Springer<br>PJ'ler (Zuschauer)                                  | Anästhesist wechselt kurz vor<br>Schnitt, erste Anästhesistin<br>kommt wieder um 08:45<br>(teilweise zu zweit); Probleme<br>mit Ableitungen                  |
| 18 | 10:30 | 11:05 | Verschluss einer Hernia<br>inguinalis (Leistenhernie)<br>(laparoskopisch)             | 2 | BEOB1;<br>BEOB3 | 1 Chirurg;<br>Anästhesie, A-Pflege zu<br>Beginn;<br>instrumentierende Pflege,<br>Springer<br>PJ'ler (Zuschauer)                                                                           |                                                                                                                                                              |
| 19 | 12:40 | 14:10 | Partielle Nephrektomie<br>(Tumor) (laparoskopisch)                                    | 4 | BEOB1;<br>BEOB3 | 2 Chirurgen +<br>Austauschstudentin<br>(Zuschauer); Anästhesie:<br>Assistenzarzt, OA bis<br>12:50, teilweise A-Pflege;<br>instrumentierende<br>Schwester, Springer;<br>PJ'ler (Zuschauer) | Wechsel Springer 13:05;<br>Anästhesist wechselt um 13:55<br>(OA übernimmt)                                                                                   |
| 20 | 11:25 | 12:38 | Unterschenkel-Amputation                                                              | 3 | BEOB1;<br>BEOB3 | Chirurg + 1 PJ'erlin am<br>Tisch;<br>Anästhesist;<br>instrumentierende Pflege,<br>Springer                                                                                                | Saal ist noch nicht frei als Pat.<br>eintrifft, da OP vorher länger<br>dauert als geplant; Pat.<br>bekommt Schmerzkatheter;<br>Anästhesist wechselt um 11:35 |
| 21 | 9:04  | 10:20 | arthroskopische Refixation<br>SSP (Diagnose: subtotale<br>Rotatorenmanschettenruptur) | 2 | BEOB1;<br>BEOB3 | 2 Chirurgen;<br>Anästhesist + 1 PJ'ler;<br>instrumentierende Pflege,<br>Springer;<br>2 Zuschauer                                                                                          | Anästhesist wechselt um 09:15;<br>"Rückwechsel" um 09:50;<br>Wechsel Springer um 10:05                                                                       |

|    |       |       |                                                                        |   |                 |                                                                                                                                                                                              |                                                                                                                                                           |
|----|-------|-------|------------------------------------------------------------------------|---|-----------------|----------------------------------------------------------------------------------------------------------------------------------------------------------------------------------------------|-----------------------------------------------------------------------------------------------------------------------------------------------------------|
| 22 | 11:42 | 13:20 | Arthroskopie der Schulter<br>(vermutete<br>Rotatorenmanschettenläsion) | 2 | BEOB1;<br>BEOB3 | 2 Chirurgen;<br>Anästhesist;<br>instrumentierende<br>Schwester, Springer;<br>Zuschauer: neue<br>Schwester (die später<br>alleine Springer ist);                                              | Springer ist länger nicht da;<br>teilweise neuer, sehr<br>unerfahrener Springer;<br>Anästhesist wechselt um 12:50                                         |
| 23 | 8:58  | 9:35  | Osteosynthese<br>(Radiusfraktur)                                       | 2 | BEOB1;<br>BEOB3 | 2 Chirurgen;<br>Anästhesist;<br>instrumentierende Pflege,<br>Springer, Pfleger der<br>Röntgen bedient<br>1 Zuschauer (unbekannt)                                                             | keine Vollnarkose; Anästhesist<br>wechselt um 09:10, kommt<br>wieder um 09:18                                                                             |
| 24 | 10:40 | 12:15 | Osteosynthese (Fraktur<br>Clavikula)                                   | 1 | BEOB1;<br>BEOB3 | 2 Chirurgen + eine<br>Studentin am Tisch;<br>Anästhesist plus teilweise<br>A-Pflege;<br>instrumentierende Pflege,<br>2 Springer, teilweise MTA<br>der Röntgen bedient;<br>Zuschauer: Student |                                                                                                                                                           |
| 25 | 8:40  | 10:25 | vierfache Hernie<br>(laparoskopisch)                                   | 2 | BEOB1;<br>BEOB3 | 2 Chirurgen;<br>Anästhesist;<br>instrumentierende Pflege,<br>Springer,<br>Schwesternschülerin<br>(fungiert teilweise alleine<br>als Springer);                                               | Anästhesist wird zeitweilig<br>vertreten; Springer wechselt um<br>09:15 (kommt 10 Minuten<br>später wieder)                                               |
| 26 | 11:30 | 13:25 | Cholezystektomie,<br>laparoskopisch                                    | 2 | BEOB1;<br>BEOB3 | 2 Chirurgen;<br>Anästhesist;<br>instrumentierende Pflege,<br>Springer, teilweise<br>Schwesternschülerin                                                                                      | Patientin stark übergewichtig<br>(BMI ca. 39); Anästhesist<br>wechselt um 12:05<br>(Pausenvertretung bis 12:45);<br>(erster) Chirurg geht um ca.<br>13:25 |

|    |       |       |                                                                                                |   |                 |                                                                                                                                                                                                                       |                                                                                                                                                                                                                                                                            |
|----|-------|-------|------------------------------------------------------------------------------------------------|---|-----------------|-----------------------------------------------------------------------------------------------------------------------------------------------------------------------------------------------------------------------|----------------------------------------------------------------------------------------------------------------------------------------------------------------------------------------------------------------------------------------------------------------------------|
| 27 | 9:55  | 13:35 | Tumorentfernung,<br>Halspräparation (medulläres<br>Schilddrüsenkarzinom)                       | 3 | BEOB1;<br>BEOB3 | 2 Chirurgen + 1 Praktikant<br>am Tisch;<br>Anästhesist;<br>instrumentierende Pflege,<br>Springer. teilweise 1<br>weitere sterile Schwester,<br>teilweise 2. Springer<br>(Schwesterschülerin);<br>Zuschauer: 2 PJ'ler; | Anästhesist wechselt um 11:30;<br>zuschauende PJ'ler gehen um<br>11:55; Eingriff dauert<br>normalerweise um die 6<br>Stunden; Chirurgen haben aber<br>„straight, konzentriert,<br>hervorragend gearbeitet“ --> in<br>kürzerer Zeit geschafft (eigene<br>Aussage Chirurgie) |
| 28 | 15:05 | 15:34 | Resektion dorsales<br>Handgelenks Ganglion                                                     | 1 | BEOB1;<br>BEOB3 | 1 Chirurg + 1 Gastarzt aus<br>USA am Tisch;<br>Anästhesistin;<br>instrumentierende Pflege,<br>Springer;<br>Zuschauer: 2 PJ'ler                                                                                        |                                                                                                                                                                                                                                                                            |
| 29 | 8:30  | 9:50  | Hemithyreoektomie +<br>zentrale Halspräparation<br>(Diagnose: suspekter<br>Schilddrüsenknoten) | 2 | BEOB1;<br>BEOB3 | Chirurgen + 1 Student am<br>Tisch;<br>Anästhesistin + PJ'lerin,<br>teilweise A-Pflege;<br>instrumentierende Pflege,<br>teilweise 2 Springer;<br>teilweise 2 Zuschauer<br>(Studenten);                                 | 1. Chirurg geht um 09:30                                                                                                                                                                                                                                                   |
| 30 | 10:45 | 11:30 | Ileostoma-Rückverlagerung                                                                      | 3 | BEOB1;<br>BEOB3 | 2 Chirurgen + 1 PJ'ler am<br>Tisch;<br>Anästhesist, teilweise A-<br>Pflege;<br>instrumentierende<br>Schwester, 2 Springer<br>(einer davon recht neu);                                                                 | Anästhesist wechselt um 11:15                                                                                                                                                                                                                                              |
| 31 | 12:35 | 13:07 | Cholezystektomie,<br>laparoskopisch                                                            | 2 | BEOB1;<br>BEOB3 | 2 Chirurgen + PJ'ler am<br>Tisch;<br>Anästhesist, teilweise A-<br>Pflege<br>instrumentierende Pflege,<br>Springer (teilweise nicht<br>da); Pflege-Schülerin;                                                          | Hepatitis-B-Patientin;<br>Schwesterschülerin fungiert<br>als Springer wenn eigentlicher<br>Springer abwesend ist; 1.<br>Chirurg geht um 12:55                                                                                                                              |

|    |       |       |                                                                                                                |   |              |                                                                                                                                                 |                                                                                                                             |
|----|-------|-------|----------------------------------------------------------------------------------------------------------------|---|--------------|-------------------------------------------------------------------------------------------------------------------------------------------------|-----------------------------------------------------------------------------------------------------------------------------|
| 32 | 8:55  | 9:35  | Rekonstruktion Kapselbandapparat (mit Schraube); Diagnose: Ellenbogenluxation, knöcherner Ausriss ulnare Sehne | 2 | BEOB1; BEOB3 | 2 Chirurgen + 1 PJ'ler am Tisch; Anästhesist; instrumentierende Pflege, Springer                                                                |                                                                                                                             |
| 33 | 10:35 | 12:03 | Plattenosteosynthese, distaler Radius                                                                          | 1 | BEOB1; BEOB3 | 2 Chirurgen; Anästhesist; instrumentierende Pflege, (teilweise 2) Springer; Zuschauer: 1 PJ'ler;                                                | ein Chirurg übernimmt zeitweise den Part der instrumentierenden Schwester (Grund unklar); Bohrer funktioniert nicht richtig |
| 34 | 13:15 | 14:25 | Arthroskopie Knie + OATS-Plastik                                                                               | 3 | BEOB1; BEOB3 | 2 Chirurgen; Anästhesist; instrumentierende Pflege, 2 Springer; Zuschauer: 1 PJ'ler (später ab ca. 13:50 am Tisch)                              | Anästhesist wechselt um 14:10                                                                                               |
| 35 | 9:45  | 10:45 | Leistenhernie (TAPP) (laparoskopisch)                                                                          | 2 | BEOB1; BEOB3 | 2 Chirurgen; Anästhesistin; instrumentierende Pflege, Springer; teilweise Schwesternschülerin; Zuschauer: Studentin                             |                                                                                                                             |
| 36 | 12:15 | 12:50 | Perkutane Verschraubung Herbertschraube (Scaphoidfraktur)                                                      | 1 | BEOB1; BEOB3 | 2 Chirurgen; Anästhesist; instrumentierende Pflege, Springer; 4 Zuschauer (Studenten; Gäste)                                                    |                                                                                                                             |
| 37 | 9:30  | 13:27 | mikroskopischer Mitralklappenersatz (MKE)                                                                      | 3 | BEOB1; BEOB3 | 2 Chirurgen + 1 Studentin am Tisch; Anästhesist; instrumentierende Pflege, Springer, Schwesternschülerin; Kardiotechniker; diverse Zuschauer (2 | allgemein immer mal wieder wechselnde Zuschauer; assistierende Chirurgin geht um 13:15                                      |

|           |       |       |                                                                  |   |                 |                                                                                                                                                                                                                                                                                                                                                                                                         |
|-----------|-------|-------|------------------------------------------------------------------|---|-----------------|---------------------------------------------------------------------------------------------------------------------------------------------------------------------------------------------------------------------------------------------------------------------------------------------------------------------------------------------------------------------------------------------------------|
|           |       |       |                                                                  |   |                 | davon englischsprachig);<br>später ein Vertreter einer<br>Firma<br>(Instrumentenherstellung)                                                                                                                                                                                                                                                                                                            |
| <b>38</b> | 8:45  | 9:30  | PE bei Magenkarzinom<br>(Magenvorderfläche)<br>(laparoskopisch)  | 3 | BEOB2;<br>BEOB3 | 2 Chirurgen;<br>Anästhesist;<br>instrumentierende Pflege,<br>Springer + Helfer Pflege                                                                                                                                                                                                                                                                                                                   |
| <b>39</b> | 13:05 | 12:46 | Bauchlückenverschluss -<br>BLV mit Netz, offen<br>(Narbenhernie) | 3 | BEOB2;<br>BEOB3 | 2 Chirurgen;<br>Anästhesistin, A-Pflege;<br>Instrumentierende Pflege,<br>Springer + Schülerin<br>Springer wechselt unter OP<br>(Pausenvertretung)                                                                                                                                                                                                                                                       |
| <b>40</b> | 9:53  | 11:32 | Y-Stent-Graft (Diagnose:<br>BAA)                                 | 4 | BEOB1;<br>BEOB3 | 2 Chirurgen;<br>Anästhesist;<br>instrumentierende Pflege,<br>Springer, MTA am<br>Röntgengerät<br>keine Vollnarkose;<br>Kommunikation mit dem<br>Patienten notwendig, da der<br>beim Einsetzen des STENTS<br>die Luft anhalten muss; Patient<br>spricht aber kein Deutsch --><br>MTA am Röntgen übersetzt /<br>übernimmt Anweisungen auf<br>Russisch; Springer wechselt<br>10:50, "Rückwechsel" um 11:10 |
| <b>41</b> | 12:47 | 14:58 | TEA + Patch linke AFC<br>(Thrombektomie)                         | 3 | BEOB1;<br>BEOB3 | 2 Chirurgen, ab 13:20<br>Studentin am Tisch;<br>Anästhesist<br>instrumentierende Pflege,<br>Springer<br>Pausenvertretung Springer von<br>13:10 bis 13:40; OA-C (1.<br>Chirurg) geht um 14:15                                                                                                                                                                                                            |



|    |       |       |                                                                                                                  |   |                 |                                                                                                                                                              |                                                                                                                                                                 |
|----|-------|-------|------------------------------------------------------------------------------------------------------------------|---|-----------------|--------------------------------------------------------------------------------------------------------------------------------------------------------------|-----------------------------------------------------------------------------------------------------------------------------------------------------------------|
| 42 | 8:30  | 9:45  | Verschluss Leistenhernie (Netz), laparoskopisch                                                                  | 2 | BEOB2;<br>BEOB3 | 2 Chirurgen (OA 20 min nach Schnitt);<br>Anästhesist + PJ'ler;<br>Instrumentierende Pflege,<br>Springer                                                      | OA Chir kommt dazu, recht lebendig dann; Assistenz-Arzt operiert die ganze Zeit unter Anleitung / Supervision; OA verlässt den OP nachdem das Netz angenäht ist |
| 43 | 12:10 | 12:56 | Cholezystektomie, laparoskopisch                                                                                 | 2 | BEOB2;<br>BEOB3 | 2 Chirurgen;<br>Anästhesist + zeitweise A-Pflege;<br>Instrumentierende Pflege,<br>Springer                                                                   | hektische Phase nachdem Patient in OP war bis zum Start der OP, unter OP recht ruhig                                                                            |
| 44 | 9:58  | 10:45 | Osteosyntheseverfahren durch (Medartis)Platte; Handgelenk                                                        | 2 | BEOB1;<br>BEOB3 | Chirurg;<br>Anästhesistin;<br>instrumentierende Pflege,<br>Springer, teilweise MTA (Röntgen)                                                                 | keine Vollnarkose;<br>Anästhesistin wechselt;<br>Springer spricht nicht gut deutsch und ist neu                                                                 |
| 45 | 11:29 | 12:05 | Metallentfernung (Entfernung Platte Schulter)                                                                    | 1 | BEOB1;<br>BEOB3 | Chirurg + ab 11:40 PJ'ler am Tisch;<br>Anästhesistin;<br>Instrumentierende Pflege,<br>Springer                                                               | Springer spricht nicht gut Deutsch und ist neu                                                                                                                  |
| 46 | 13:01 | 13:25 | Restgastrektomie                                                                                                 | 2 | BEOB2;<br>BEOB3 | 2 Chirurgen (nach 60 min + 1 PJ'tler);<br>Anästhesie + A-Pflege;<br>Instrumentierende Pflege,<br>2 Springer                                                  | chirug. Pflege kurz pausiert unter OP (von Springer abgelöst)                                                                                                   |
| 47 | 10:45 | 13:25 | ASK Meniskus Teilresektion, Zystenauffüllung, RIA-Spongiosegewinnung rechts, evtl. OATS-Plastik (laparoskopisch) | 2 | BEOB1;<br>BEOB3 | 2 Chirurgen + englischsprechender Gasterzt am Tisch;<br>Anästhesist;<br>instrumentierende Pflege,<br>Springer; teilweise ein Zuschauer, zeitweise 1 Fotograf | Anästhesie wechselt, wenden recht neue Methode an, wird viel drüber geredet; erster Chirurg verlässt Tisch um 13:15;<br>Zweitweise werden Fotos gemacht         |

|    |       |       |                                                                       |   |                 |                                                                                                                                  |                                                                                                                                         |
|----|-------|-------|-----------------------------------------------------------------------|---|-----------------|----------------------------------------------------------------------------------------------------------------------------------|-----------------------------------------------------------------------------------------------------------------------------------------|
| 48 | 8:40  | 11:00 | Bauchwandhernie;<br>Netzeinlage (offen)                               | 3 | BEOB1;<br>BEOB3 | 2 Chirurgen;<br>Anästhesist;<br>instrumentierende<br>Schwester, Springer +<br>teilweise<br>Schwesternschülerin                   | HIV-Patient (geringe Viruslast);<br>Chirurgen kommen recht spät;<br>Anästhesist wechselt um 09:20<br>(Pausenvertretung bis 09:45)       |
| 49 | 11:50 | 13:35 | offene Hemicolektomie mit<br>Anastomose                               | 2 | BEOB1;<br>BEOB3 | 3 Chirurgen am Tisch;<br>Anästhesist;<br>instrumentierende Pflege,<br>Springer;<br>kurzzeitig als Zuschauer:<br>Studentin        | Springer wechselt;<br>chirurgischer OA geht um 12:55                                                                                    |
| 50 | 14:03 | 14:23 | transperitoneale<br>Nabelhernie, Netzeinsatz,<br>laparoskopisch, IPOM | 2 | BEOB1;<br>BEOB3 | 2 Chirurgen;<br>Anästhesist;<br>instrumentierende Pflege,<br>Springer                                                            |                                                                                                                                         |
| 51 | 9:25  | 10:05 | Ileostoma-Rückverlagerung                                             | 3 | BEOB1;<br>BEOB3 | 2 Chirurgen;<br>Anästhesist;<br>instrumentierende Pflege,<br>Springer; teilweise zweiter<br>Springer und Besucher                | 1. Chirurg geht um 10:00                                                                                                                |
| 52 | 9:02  | 10:15 | Osteosynthese mittels<br>Philosplatte<br>(Humeruskopffraktur)         | 2 | BEOB1;<br>BEOB3 | 3 Chirurgen am Tisch<br>(davon ein<br>englischsprachiger<br>Gastarzt;<br>Anästhesistin;<br>instrumentierende Pflege,<br>Springer | Hauptoperateur erklärt Gastarzt<br>viel auf Englisch; Springer recht<br>unerfahren; Anästhesist<br>wechselt um 9:20                     |
| 53 | 11:35 | 13:00 | Osteosynthese durch Philos-<br>Platte, Humerusfraktur                 | 2 | BEOB1;<br>BEOB3 | 2 Chirurgen;<br>Anästhesist;<br>instrumentierende Pflege,<br>Springer;<br>teilweise Zuschauer<br>(Gast-Student)                  | instrumentierende Pflege<br>wechselt um 12:20; Springer<br>wird instrumentierend, neuer<br>Springer kommt; ein Chirurg<br>geht um 12:48 |

|    |       |       |                                                                                                                                             |   |                 |                                                                                                                         |                                                                                                                                                                           |
|----|-------|-------|---------------------------------------------------------------------------------------------------------------------------------------------|---|-----------------|-------------------------------------------------------------------------------------------------------------------------|---------------------------------------------------------------------------------------------------------------------------------------------------------------------------|
| 54 | 9:00  | 9:53  | Verschluss abdominaler Hernien (offen)                                                                                                      | 3 | BEOB1;<br>BEOB3 | 2 Chirurgen + eine PJ'lerin am Tisch;<br>Anästhesist + eine Studentin<br>instrumentierende Pflege,<br>Springer;         | Patient HIV-positiv                                                                                                                                                       |
| 55 | 11:19 | 12:55 | Osteosynthese mittels Philosplatte, Schulter                                                                                                | 3 | BEOB1;<br>BEOB3 | 2 Chirurgen;<br>Anästhesie;<br>instrumentierende Pflege,<br>Springer;<br>Zuschauer: englisch<br>sprechender Gaststudent | Erklärungen an Gast auf Englisch; Anästhesistin wechselt bei Beginn OP, kommt zurück um ca. 11:40; Springer wechselt; erster Chirurg verlässt Tisch um 12:45              |
| 56 | 9:47  | 12:50 | Recrossektomie Leiste, SA + Perforansligatur (Diagnose: Rezidivvarikosis)                                                                   | 2 | BEOB1;<br>BEOB3 | 2 Chirurgen + Studentin am Tisch;<br>Anästhesist + PJ'ler;<br>instrumentierende Pflege,<br>Springer                     | Anästhesist wechselt um 11:30 (Pausenvertretung), kommt wieder um 12:00; erster Chirurg verlässt Tisch im 12:45                                                           |
| 57 | 14:25 | 16:45 | arthroskopisch assistierte BK<br>Auffüllung Knie;<br>Spongiosaentnahme<br>ipsilateral femur (Diagnose:<br>vordere<br>Kreuzbandinsuffizienz) | 2 | BEOB1;<br>BEOB3 | 2 Chirurgen;<br>Anästhesie;<br>instrumentierende Pflege,<br>teilweise 2 Springer                                        | Wechsel Anästhesie um 15:00;<br>instrumentierende Pflege<br>wechselt um 15:40, zweite<br>instrumentierende Schwester<br>besseres Monitoring; Wechsel<br>auch bei Springer |
| 58 | 8:50  | 9:35  | diagnostische Laparoskopie;<br>(Z.n. Pankreaslinksresektion<br>bei Pankreaskarzinom)                                                        | 2 | BEOB1;<br>BEOB3 | 2 Chirurgen;<br>Anästhesist;<br>instrumentierende<br>Schwester, Springer                                                | Anästhesist wird am Anfang der<br>OP mal kurz vertreten                                                                                                                   |
| 59 | 12:15 | 13:15 | VATS Hämatomausräumung<br>bei Hämatothorax<br>(laparoskopisch)                                                                              | 3 | BEOB1;<br>BEOB3 | 2 Chirurgen;<br>Anästhesist + A-Pflege,<br>instrumentierende Pflege,<br>Springer;<br>teilweise<br>Schwesternschülerin   |                                                                                                                                                                           |

|    |      |       |                                                                                     |   |                 |                                                                                                                                                 |                                                                                                                                                                                                |
|----|------|-------|-------------------------------------------------------------------------------------|---|-----------------|-------------------------------------------------------------------------------------------------------------------------------------------------|------------------------------------------------------------------------------------------------------------------------------------------------------------------------------------------------|
| 60 | 9:50 | 10:42 | Leistenhernie; TAPP (laparoskopisch)                                                | 2 | BEOB1;<br>BEOB3 | 2 Chirurgen;<br>Anästhesist + 1, teilweise<br>2 PJ'ler / Famulant;<br>instrumentierende<br>Schwester, Springer                                  | bei Ausleitung keine A-Pflege da, nur Famulant                                                                                                                                                 |
| 61 | 9:18 | 12:09 | Leberresektomie (geplant; jedoch unter OP entschieden, Leber partiell zu entfernen) | 3 | BEOB2;<br>BEOB3 | 2 Chirurgen + 1PJ'ler am Tisch;<br>Anästhesist + A-Pflege;<br>Instrumentierende Pflege,<br>Springer                                             | (Zertifizierung angekündigt); Haupt-Operateur erklärt nach OP, es wäre eine anstrengende OP gewesen und: „sehr schwieriger Eingriff“; Planänderung während des Eingriffs (Leber wird halbiert) |
| 62 | 8:29 | 9:10  | Leistenhernie rechts                                                                | 2 | BEOB2;<br>BEOB3 | 2 Chirurgen;<br>Anästhesistin + A-Pflege;<br>Instrumentierende Pflege,<br>Springer                                                              | Beginn recht hektisch, da Operateur da und Patient noch nicht fertig; sehr schneller, einfacher Eingriff                                                                                       |
| 63 | 9:57 | 11:56 | Hemikolektomie rechts                                                               | 3 | BEOB2;<br>BEOB3 | Chirurg + 1 PJ'ler am Tisch, nach 60 min 2. PF'ler;<br>Anästhesistin;<br>Instrumentierende Pflege,<br>Springer                                  | Time-out nebenher beim Abwaschen; ab Mitte der OP zwei PJ'ler anwesend                                                                                                                         |
| 64 | 8:55 | 11:04 | Hiatus Hernie (OP laparoskopische FPL + Hiatusplastik)                              | 2 | BEOB2;<br>BEOB3 | 2 Chirurgen (zweiter Chirurg nach 20 min) + PJ'ler am Tisch;<br>Anästhesist;<br>Instrumentierende Pflege,<br>Springer<br>anfänglich 2 Zuschauer | nach ca. 50 min angeleitete OP (Chirurg übergibt an Ass und supervisiert); letzte 30 min Endoskopie (zur Kontrolle)                                                                            |
